# Supplementary material for: Efficient symmetry breaking spin–orbit charge transfer-induced intersystem crossing in compact orthogonal perylene-phenothiazine or -phenoxazine triads and observation of the delayed fluorescence
Source: Royal Society of Chemistry journal article supplement (doi:10.1039/d2tc01640k), 2022-01-01
Supplement: d2tc01640k1.pdf [file d2tc01640k1.pdf]

**Electronic supplementary information for:**

**Efficient symmetry breaking spin–orbit charge  
transfer-induced intersystem crossing in compact  
orthogonal perylene-phenothiazine or-phenoxazine  
triads and observation of the delayed fluorescence**

Muhammad Imran,<sup>a,§</sup> Junhong Pang,<sup>b,§</sup> Jianzhang Zhao<sup>a,c,\*</sup> and Ming-De Li<sup>b,\*</sup>

<sup>a</sup>State Key Laboratory of Fine Chemicals, School of Chemical Engineering, Dalian  
University of Technology, 2 Ling Gong Rd., Dalian 116024, P. R. China.

E-mail: zhaojzh@dlut.edu.cn

<sup>b</sup>Department of Chemistry and Key Laboratory for Preparation and Application of  
Ordered Structure Materials of Guangdong Province, Shantou University, Shantou  
515063, P. R. China. E-mail: mdli@stu.edu.cn

<sup>c</sup>State Key Laboratory of Chemistry and Utilization of Carbon Based Energy Resources,  
College of Chemistry, Xinjiang University, Urumqi 830017, P. R. China.

§ These authors contributed equally to this work.

## Contents

|    |                                                         |          |
|----|---------------------------------------------------------|----------|
| 1  | General information                                     | Page S3  |
| 2  | Synthesis and characterization data                     | Page S3  |
| 3  | UV-vis absorption spectra                               | Page S9  |
| 4  | Fluorescence emission spectra and lifetime decay traces | Page S10 |
| 5  | Electrochemical study                                   | Page S12 |
| 6  | Chemical oxidation and steady-state ESR spectroscopy    | Page S14 |
| 7  | Singlet oxygen quantum yield determination              | Page S16 |
| 8  | Femtosecond transient absorption spectral study         | Page S17 |
| 9  | Nanosecond transient absorption spectroscopy            | Page S22 |
| 10 | Intrinsic triplet state lifetime fitting parameters     | Page S29 |
| 11 | Nanosecond transient emission spectroscopy              | Page S30 |
| 12 | Density functional theory calculations                  | Page S32 |
| 13 | References                                              | Page S34 |

## 1. General information

All the chemicals were analytically pure and used as received throughout the synthesis.  $^1\text{H}$  and  $^{13}\text{C}$  NMR shifts are reported in parts per millions (ppm) relative to TMS, with the residual peaks are used as internal reference. The mass spectra were measured by TOF-HRMS-MALDI and TOF-MS-EI spectrometers.

## 2. Synthesis and characterization data

**Synthesis of Pery-2Br.**<sup>1</sup> In a 500 mL double-neck round bottom flask, perylene (2.0 g, 7.92 mmol) was dissolved in dry THF (320 mL). To this solution, *N*-bromosuccinimide (NBS) (4.24 g, 23.8 mmol) was added in one portion. The reaction mixture was stirred overnight at RT. After 30 h, the mixture was slowly poured into water (1500 mL) and stirred for 30 minutes. The solid dibromoperylene was collected by filtration and dried under vacuum. A yellow solid was obtained (2.4 g, yield 91%). By following the literature method,<sup>2</sup> 3,9-dibromoperylene was obtained after repeated recrystallization from aniline/nitrobenzene (1:1) 10 mL/10 mL mixture solution on heating at 160 °C. The ratio of regio-isomer (3,9-dibromoperylene) was checked on the basis of  $^1\text{H}$ -NMR spectra. The 3,9-dibromoperylene regio-isomer was obtained with a ratio of 71 to 29 with 3,10-dibromoperylene and used for the next reactions. Mp: > 250 °C.  $^1\text{H}$  NMR ( $\text{CDCl}_3$ , 400 MHz):  $\delta$  = 8.20 (d, 2H,  $J$  = 8.0 Hz), 8.11 (d, 2H,  $J$  = 12.0 Hz), 7.95 (dd, 2H,  $J_1$  = 8.0 Hz,  $J_2$  = 8.0 Hz), 7.77 – 7.72 (m, 2H), 7.60 – 7.54 (m, 2H). TOF MS EI<sup>+</sup>: Calcd ( $[\text{C}_{20}\text{H}_{10}\text{Br}_2]^+$ ),  $m/z$  = 407.9149; found,  $m/z$  = 407.9160.

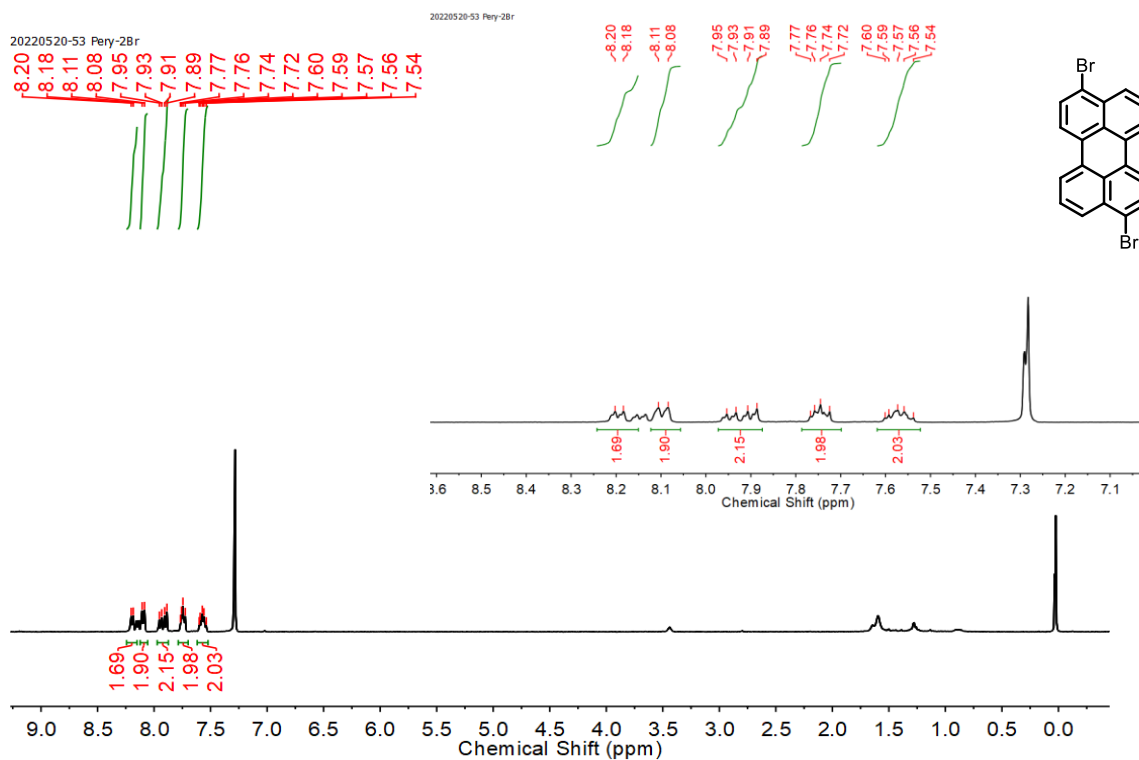

Fig. S1  $^1\text{H}$  NMR spectrum of **Pery-2Br** ( $\text{CDCl}_3$ , 400 MHz).

### Elemental Composition Report

Page 1

#### Single Mass Analysis

Tolerance = 200.0 mDa / DBE: min = -1.5, max = 50.0

Isotope cluster parameters: Separation = 1.0 Abundance = 1.0%

Monoisotopic Mass, Odd and Even Electron Ions

3 formula(e) evaluated with 1 results within limits (up to 50 closest results for each mass)

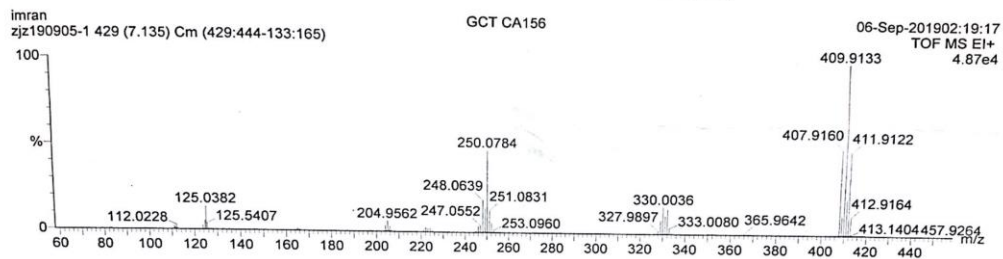

| Mass     | Calc. Mass | mDa | PPM | DBE  | Score | Formula                                         |
|----------|------------|-----|-----|------|-------|-------------------------------------------------|
| 407.9160 | 407.9149   | 1.1 | 2.6 | 15.0 | 1     | C <sub>20</sub> H <sub>10</sub> Br <sub>2</sub> |

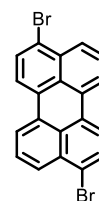

Fig. S2 TOF-MS EI<sup>+</sup> spectrum of **Pery-2Br**.

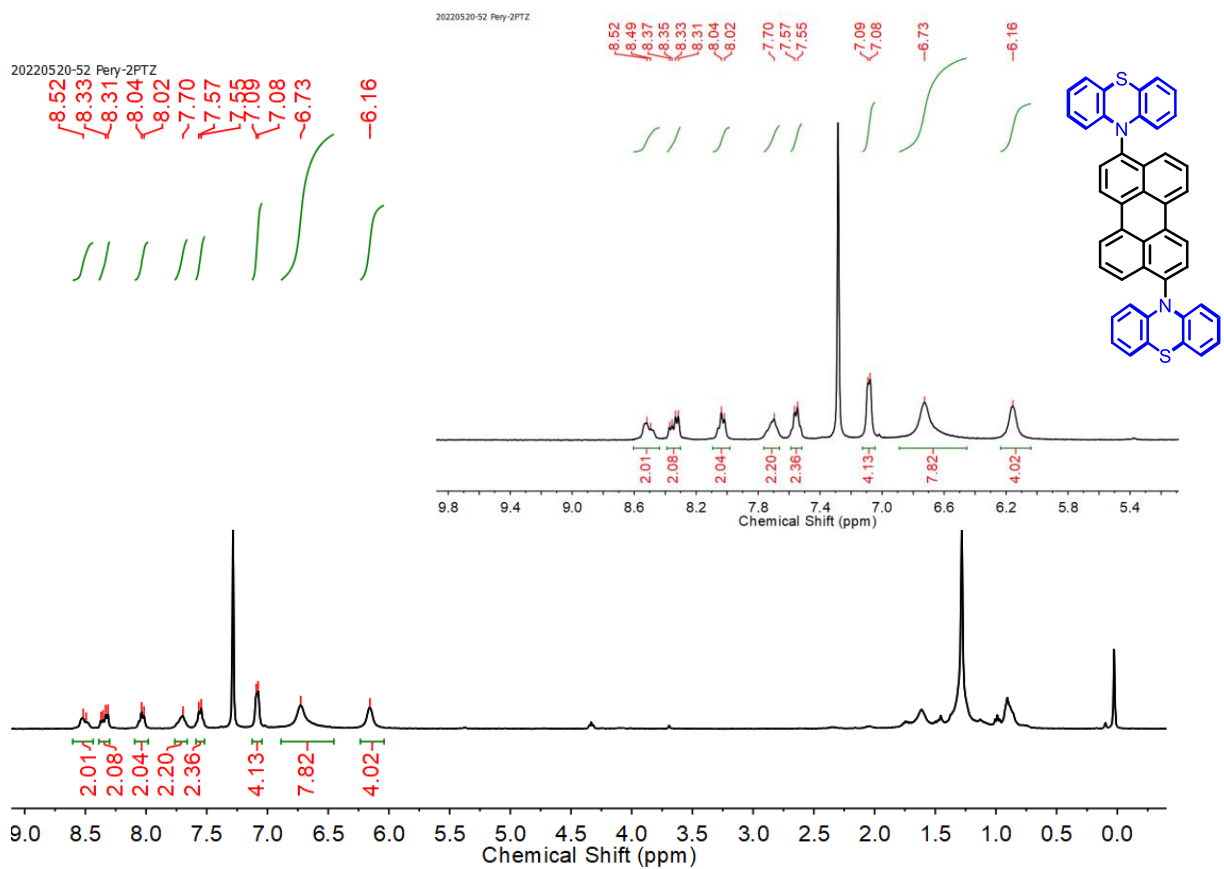

**Fig. S3**  $^1\text{H}$  NMR spectra of **Pery-2PTZ** ( $\text{CDCl}_3$ , 400 MHz).

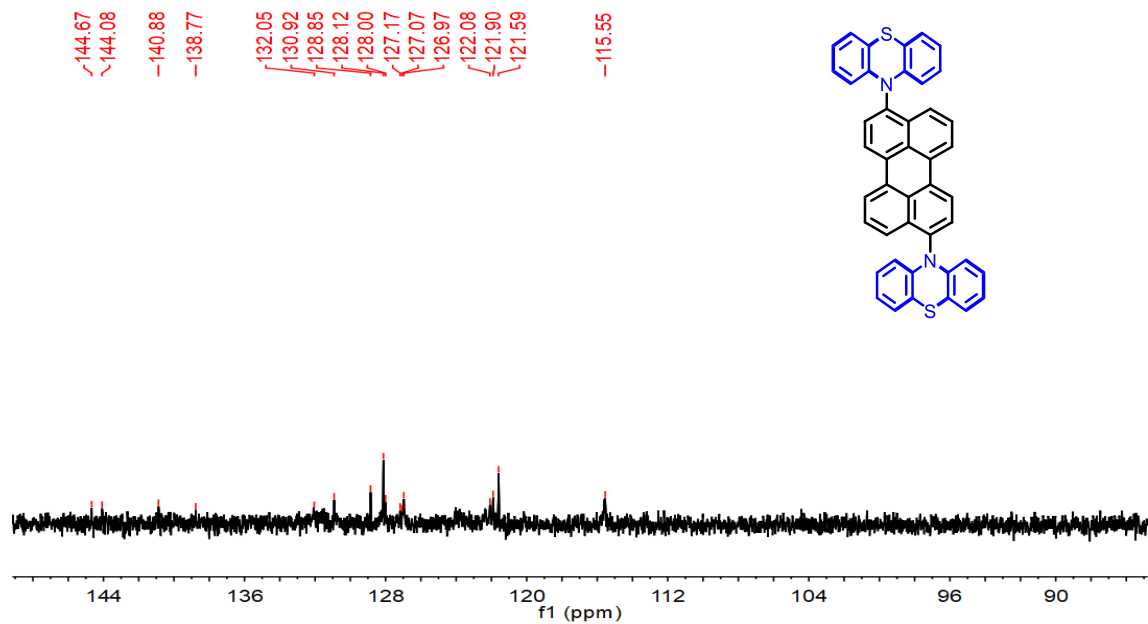

**Fig. S4**  $^{13}\text{C}$  NMR spectrum of **Pery-2PTZ** ( $\text{CDCl}_3$ , 126 MHz).

### Smart Formula

| Formula                                                       | Mass     | Error  | mSigma  | DbIEq | N rule | Electron Configuration |
|---------------------------------------------------------------|----------|--------|---------|-------|--------|------------------------|
| C <sub>44</sub> H <sub>26</sub> N <sub>2</sub> S <sub>2</sub> | 646.1532 | 2.6206 | 34.0388 | 33.00 | ok     | odd                    |

M<sup>+</sup>.

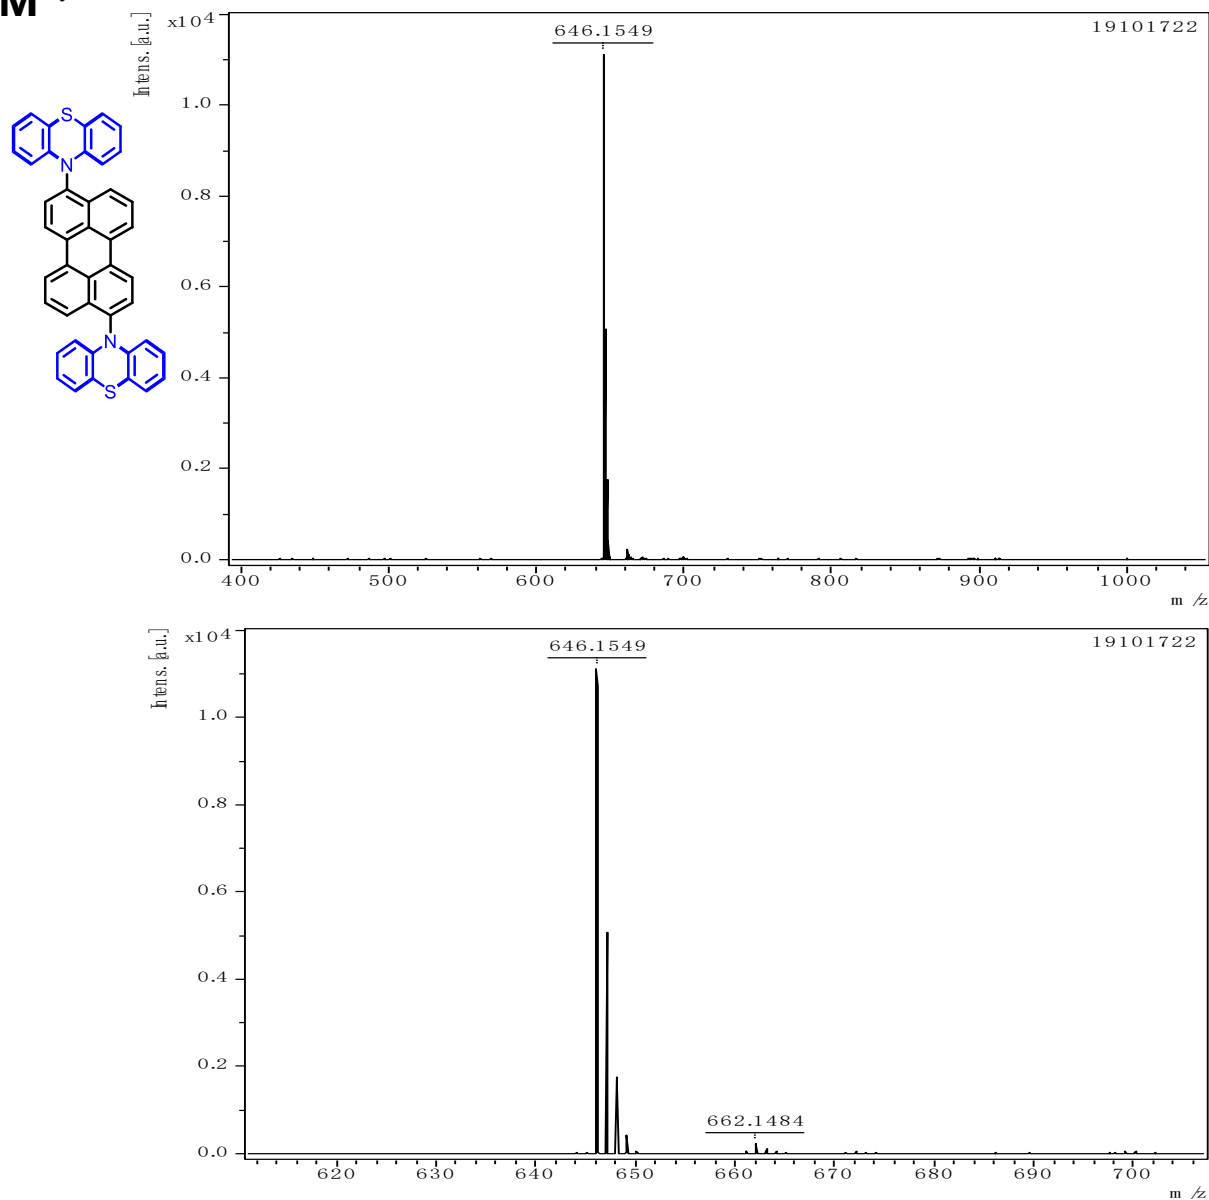

Fig. S5 MALDI-HRMS of Pery-2PTZ.

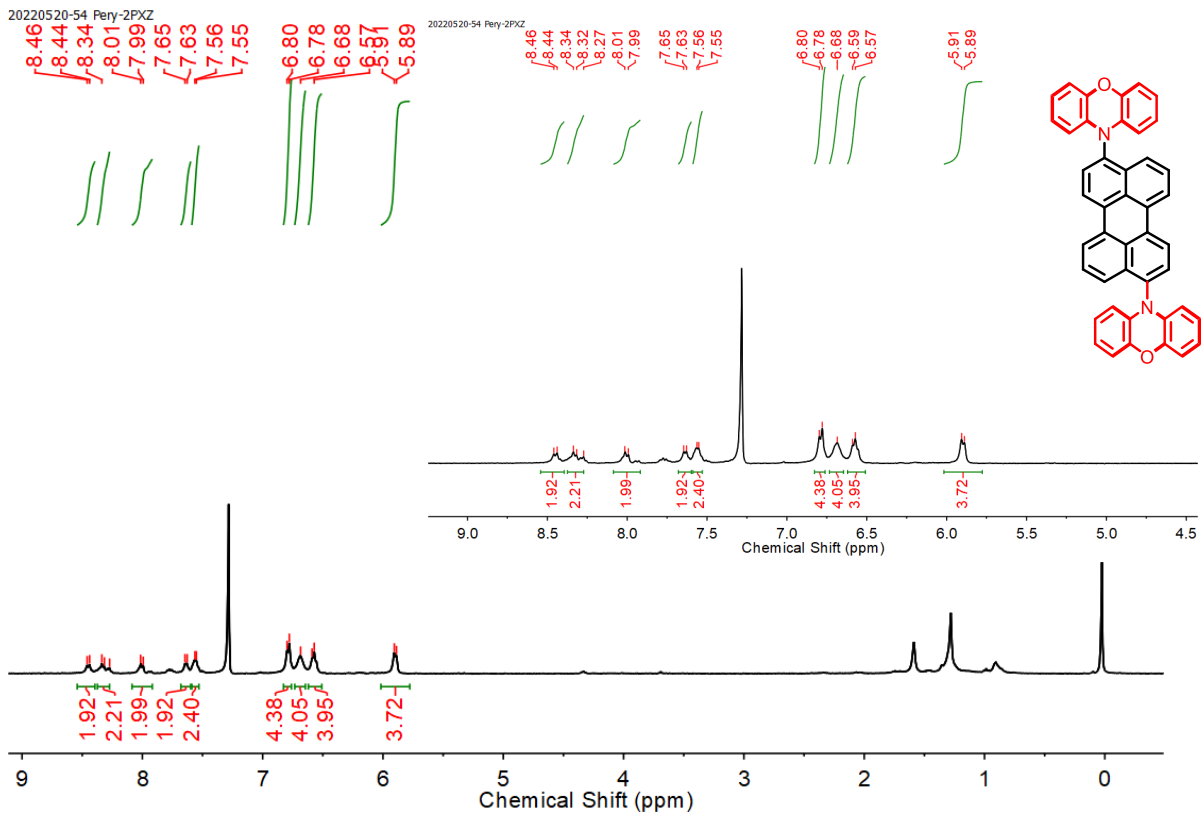

**Fig. S6.**  $^1\text{H}$  NMR spectra of **Pery-2PXZ** ( $\text{CDCl}_3$ , 400 MHz).

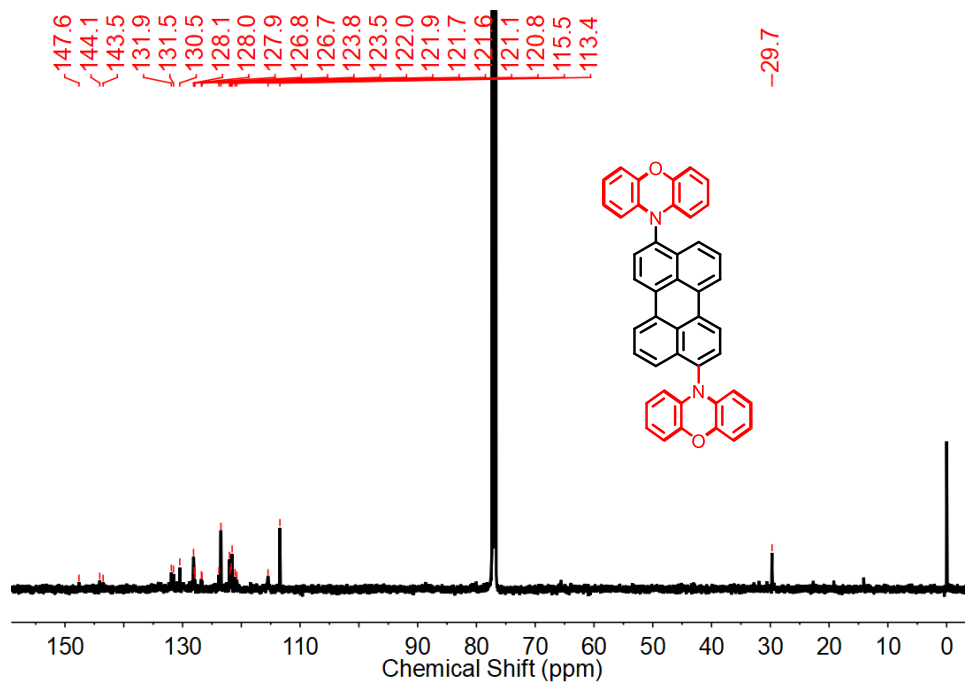

**Fig. S7**  $^{13}\text{C}$  NMR spectrum of **Pery-2PXZ** ( $\text{CDCl}_3$ , 126 MHz).

### Smart Formula

| Formula                                                       | Mass     | Error  | mSigma  | DbIEq | N rule | Electron Configuration |
|---------------------------------------------------------------|----------|--------|---------|-------|--------|------------------------|
| C <sub>44</sub> H <sub>26</sub> N <sub>2</sub> O <sub>2</sub> | 614.1994 | 0.6970 | 38.6447 | 33.00 | ok     | odd                    |

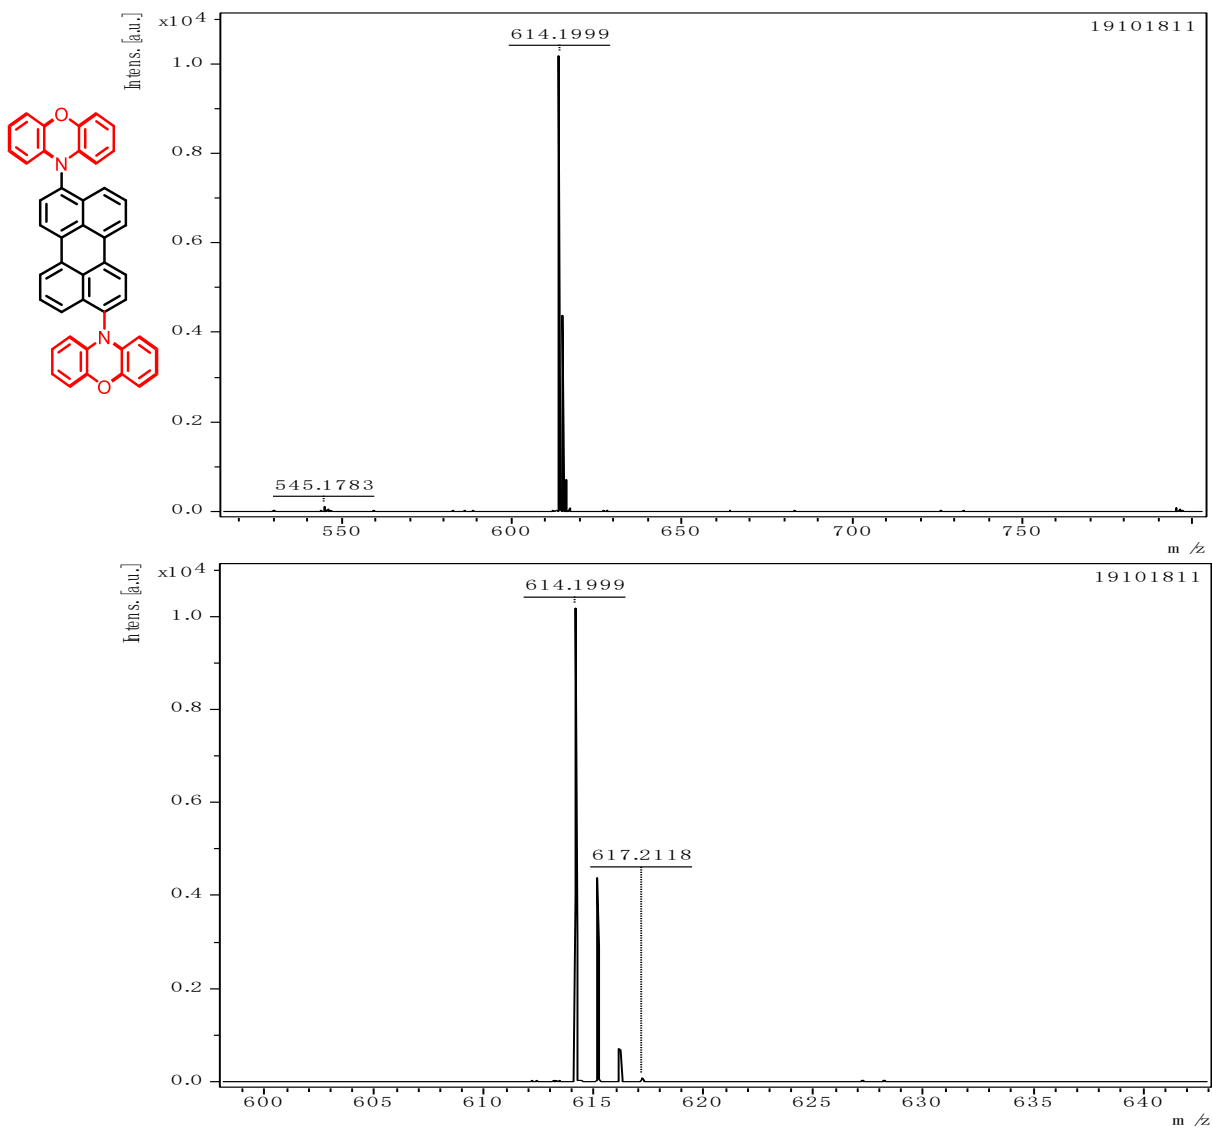

**Fig. S8** MALDI-HRMS of **Pery-2PXZ**.



### 3. UV-vis absorption spectra

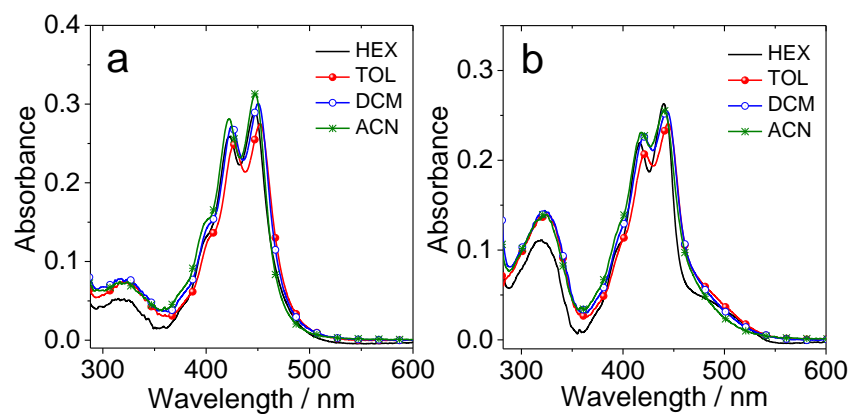

**Fig. S9** UV-vis absorption spectra of the compounds in different solvents, (a) **Pery-2PTZ** (b) **Pery-2PXZ**.  $c = 1.0 \times 10^{-5}$  M, 20 °C.

#### 4. Fluorescence emission spectra and decay traces

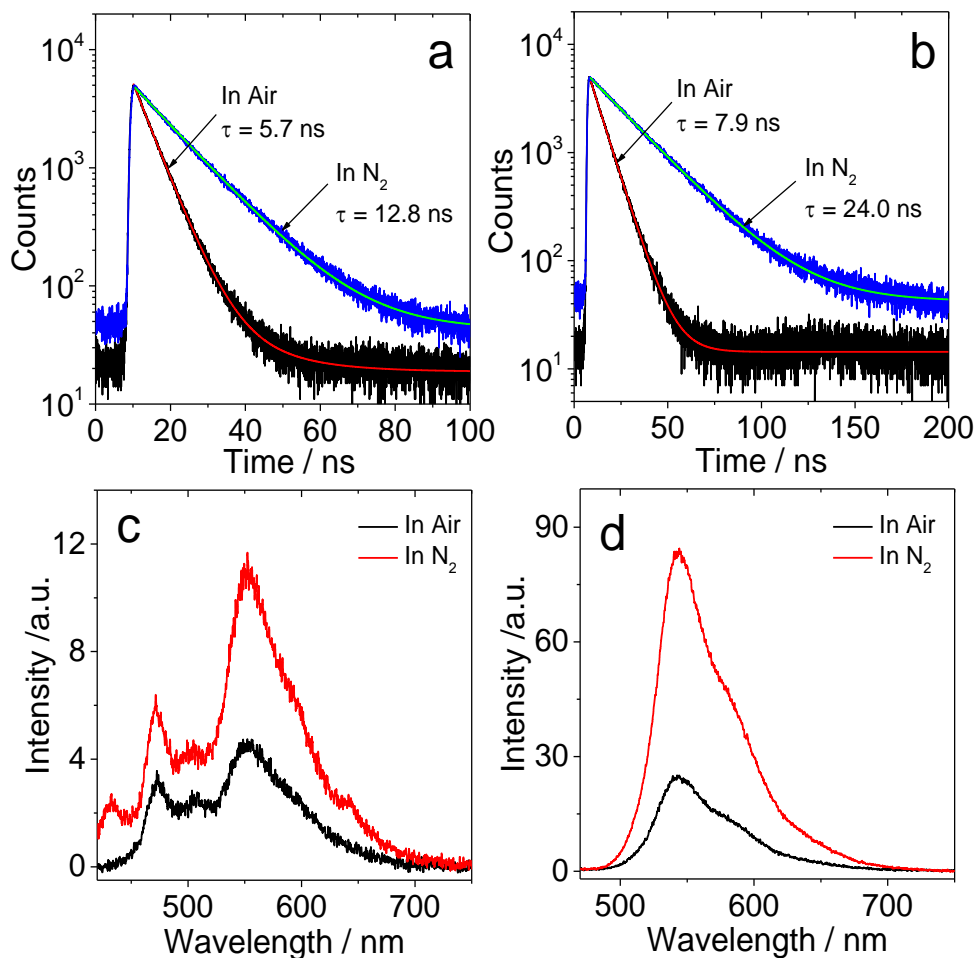

**Fig. S10** Fluorescence decay traces of (a) **Pery-2PTZ** at 551 nm; (b) **Pery-2PXZ** at 544 nm, ( $\lambda_{\text{ex}} = 445$  nm) and Fluorescence emission spectra of (c) **Pery-2PTZ**, (d) **Pery-2PXZ**, ( $\lambda_{\text{ex}} = 400$  nm) under different atmospheres (air and N<sub>2</sub>).  $c = \text{ca. } 1.0 \times 10^{-5}$  M, in *n*-hexane. 20 °C.

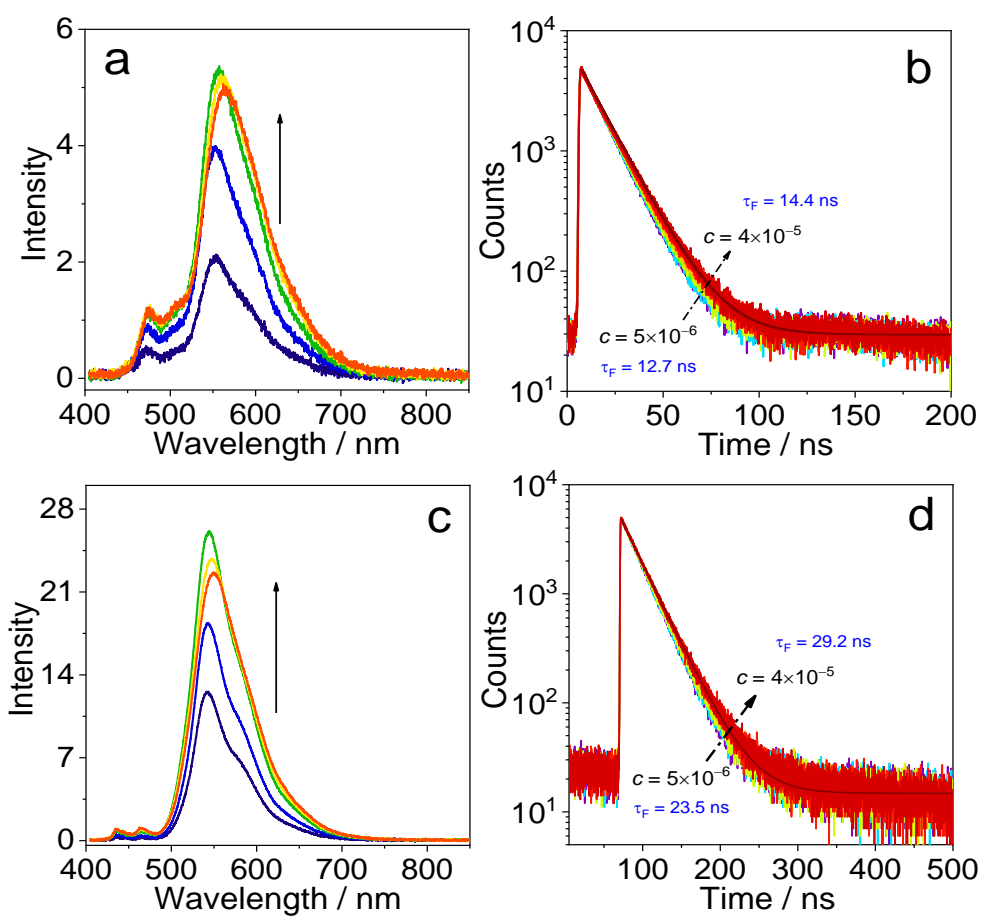

**Fig. S11** Concentration-dependent fluorescence emission spectra and emission lifetime decay traces under N<sub>2</sub> atmosphere with increasing concentration (from  $c = 5.0 \times 10^{-6}$  M to  $c = 4.0 \times 10^{-5}$  M) of (a, b) **Pery-2PXZ** and (c, d) **Pery-2PXZ**,  $\lambda_{\text{ex}} = 400$  nm for emission and  $\lambda_{\text{ex}} = 445$  nm for lifetime decay trace. In *n*-hexane. 20 °C.

## 5. Electrochemical study

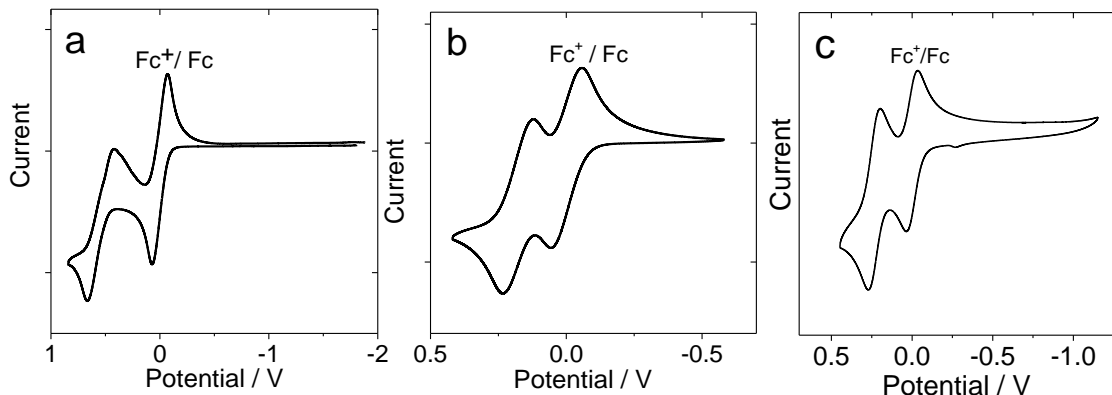

**Fig. S12** Cyclic voltammogram of the compounds (a) perylene, (b) phenothiazine and (c) phenoxazine. Ferrocene was used as an internal reference. Condition: in deaerated DCM containing 0.10 M  $\text{Bu}_4\text{N}[\text{PF}_6]$  as supporting electrolyte,  $\text{Ag}/\text{AgNO}_3$  as the reference electrode. Scan rates: 50 mV/s.  $c = 1.0 \times 10^{-3}$  M. 20 °C.

$$\Delta G_{\text{CS}}^0 = e[E_{\text{OX}} - E_{\text{RED}}] - E_{00} + \Delta G_{\text{S}} \quad (\text{Eq. S1})$$

$$\Delta G_{\text{S}} = -\frac{e^2}{4\pi\epsilon_s\epsilon_0 R_{\text{CC}}} - \frac{e^2}{8\pi\epsilon_0} \left( \frac{1}{R_{\text{D}}} + \frac{1}{R_{\text{A}}} \right) \left( \frac{1}{\epsilon_{\text{REF}}} - \frac{1}{\epsilon_{\text{S}}} \right) \quad (\text{Eq. S2})$$

$$\Delta G_{\text{CR}} = -(\Delta G_{\text{CS}} + E_{00}) \quad (\text{Eq. S3})$$

$$E_{\text{CSS}} = e[E_{\text{OX}} - E_{\text{RED}}] + \Delta G_{\text{S}} \quad (\text{Eq. S4})$$

where  $\Delta G_{\text{S}}$  is the static Coulombic energy, which is defined by eq. S2.  $e$  = electronic charge,  $E_{\text{OX}}$  = half-wave potential of the electron-donor unit for one-electron oxidation,  $E_{\text{RED}}$  = half-wave potential of the electron-acceptor unit for one-electron reduction;  $E_{00} =$

approximated energy level with the cross point of normalized UV–Vis absorption and fluorescence emission spectra at singlet excited state,  $\epsilon_s$  = static dielectric constant of the solvent,  $R_{CC}$  = center-to-center distance between electron donor unit (phenothiazine or phenoxazine) and the electron acceptor unit (perylene) determined by DFT optimization of the geometry,  $R_{CC}$  (**Pery-2PTZ**) = 6.780 Å,  $R_{CC}$  (**Pery-2PXZ**) = 6.355 Å,  $R_D$  is the radius of the electron donor,  $R_A$  is the radius of the electron acceptor,  $\epsilon_{REF}$  is the static dielectric constant of the solvent used for the electrochemical studies,  $\epsilon_0$  is the permittivity of free space. Following solvents were used in the calculation of the free energy of electron transfer, *n*-hexane ( $\epsilon_s$  = 1.88), toluene ( $\epsilon_s$  = 2.38), chloroform ( $\epsilon_s$  = 4.81), DCM ( $\epsilon_s$  = 9.1) and ACN ( $\epsilon_s$  = 37.5).

## 6. Chemical oxidation and steady-state ESR spectroscopy

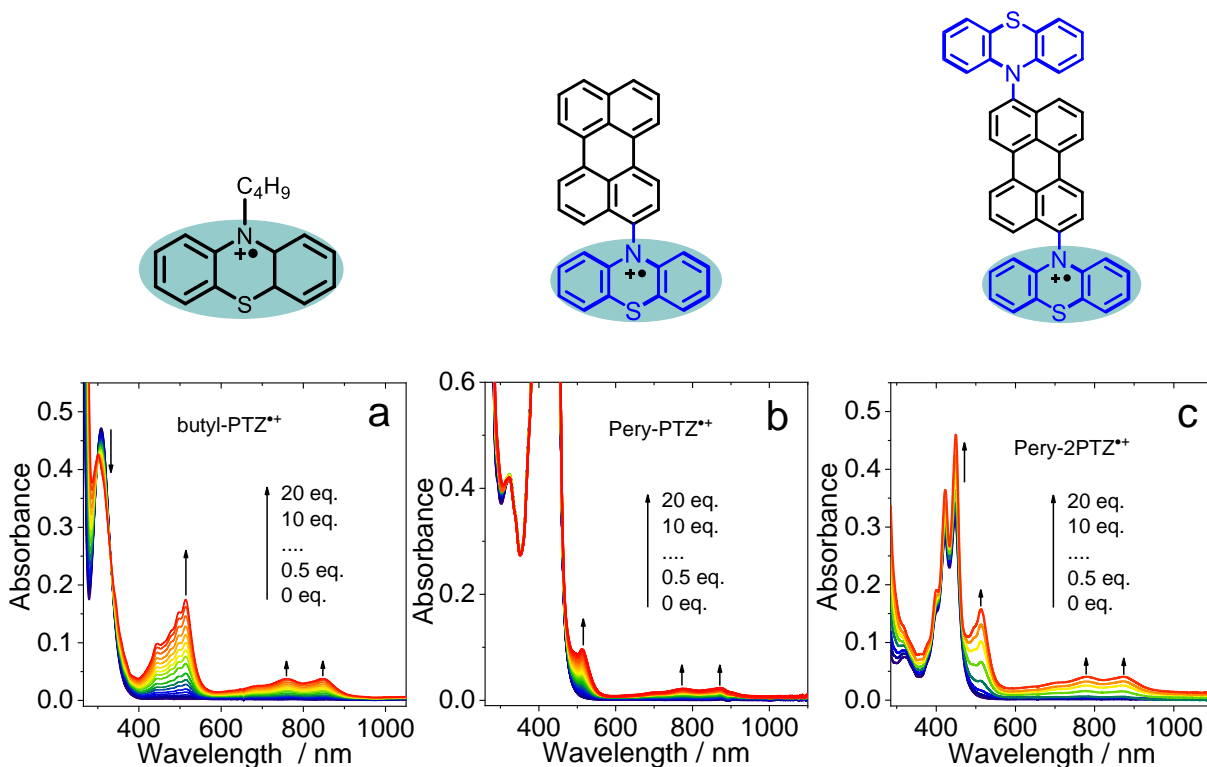

**Fig. S13.** Evolution of the UV-vis absorption spectra upon chemical oxidation of (a) *n*-butyl PTZ (b) Pery-PTZ and (c) Pery-2PTZ with nitrosonium hexafluorophosphate (NO[PF<sub>6</sub>]) as an oxidant in deaerated dry ACN solvent. 20 °C.

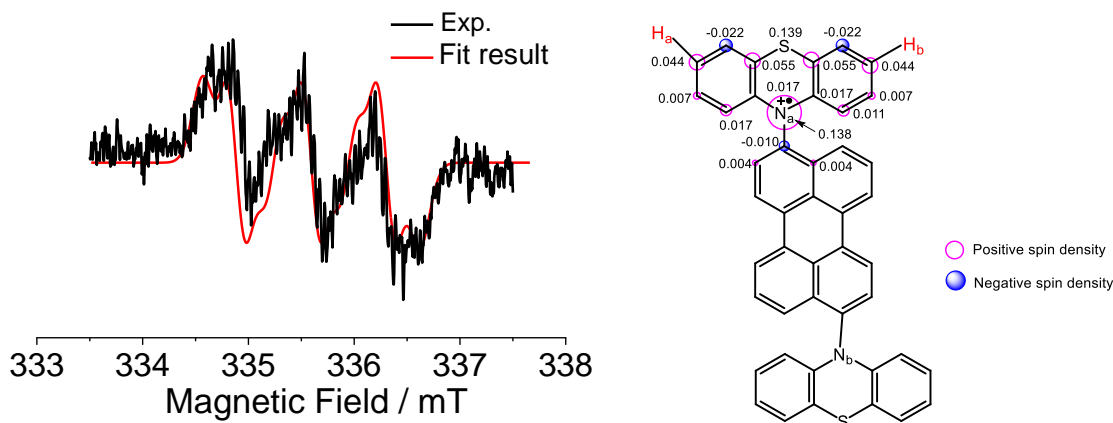

**Fig. S14.** (left) EPR spectra of **Pery-2PTZ<sup>•+</sup>** in deaerated dry ACN solvent with (NO[PF<sub>6</sub>]) as an oxidant at 300 K.  $c = 1.0 \times 10^{-3}$  M. Microwave frequency = 9.41 GHz, power = 0.200 mW, and modulation amplitude = 1 G. The simulated spectrum with the best-fit hyperfine coupling constants was obtained by Easyspin. (right) Spin density of **Pery-2PTZ<sup>•+</sup>** calculated at the B3LYP/6-31G(d) level.

**Table S1.** Hyperfine coupling (HFC) constants of **Pery-2PTZ<sup>•+</sup>** and **Pery-2PXZ<sup>•+</sup>** obtained by EPR spectral simulation and DFT calculation.

| HFC (mT)         |                   | $ a(N_a) $ | $ a(N_b) $ | $ a(H_a) $ | $ a(H_b) $ | $ a(H_c) $ | $ a(H_d) $ |
|------------------|-------------------|------------|------------|------------|------------|------------|------------|
| <b>Pery-2PTZ</b> | Cal. <sup>a</sup> | 0.42       | 0.42       | 0.12       | 0.12       |            |            |
|                  | Exp.              | 0.62       |            | 0.20       | 0.20       |            |            |
| <b>Pery-2PXZ</b> | Cal. <sup>a</sup> | 0.32       | 0.32       | 0.14       | 0.14       | 0.06       | 0.06       |
|                  | Exp.              | 0.30       |            | 0.12       | 0.12       | 0.05       | 0.05       |

<sup>a</sup>HFC constants were obtained by DFT calculation of the corresponding radical cation at the B3LYP/EPR-II.

## 7. Singlet oxygen quantum yield determination

Singlet oxygen quantum yields of the compounds (mentioned in Table 1, in the main text) were measured with Ru(bpy)<sub>3</sub>[PF<sub>6</sub>]<sub>2</sub> as standard ( $\Phi_{\Delta} = 57\%$  in DCM). 1,3-Diphenylisobenzofuran (DPBF) was used as the singlet oxygen (<sup>1</sup>O<sub>2</sub>) scavenger to monitor the <sup>1</sup>O<sub>2</sub> production by following the change of absorption of DPBF at 414 nm upon photoirradiation. To determine the singlet oxygen quantum yield ( $\Phi_{\Delta}$ ), eq. S5 was used.

$$\Phi_{\Delta,sam} = \Phi_{\Delta,std} \left( \frac{1 - 10^{-A_{std}}}{1 - 10^{-A_{sam}}} \right) \left( \frac{m_{sam}}{m_{std}} \right) \left( \frac{\eta_{sam}}{\eta_{std}} \right)^2 \quad (\text{Eq. S5})$$

Where '*sam*' and '*std*' designate the compounds and standard, respectively, *A* is the absorbance at the excitation wavelength, *m* is the slope of the plot of absorbance of DPBF at 414 nm versus the irradiation time,  $\eta$  is the refractive index of the solvent used for the measurements. The sample and the standard solutions should have the same absorbance at the excitation wavelength, for this purpose optically matched solutions were used.



## 8. Femtosecond transient absorption spectral study

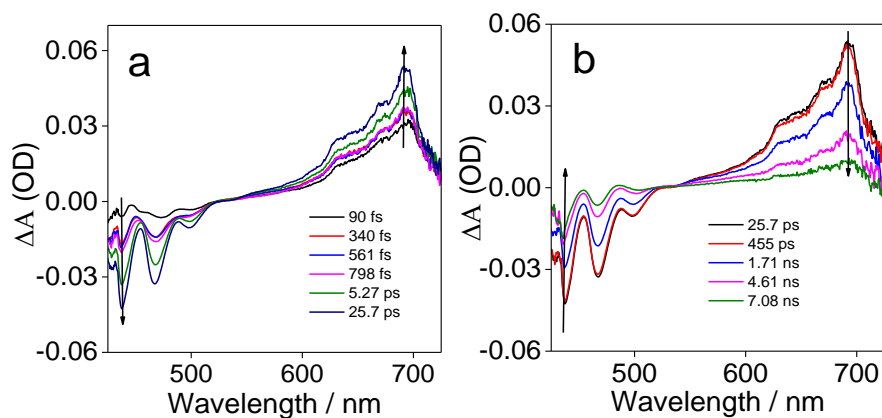

**Fig. S15** Femtosecond transient absorption spectra of pristine perylene in DCM (a) at initial delays (b) at long time delays,  $\lambda_{\text{ex}} = 400$  nm. 20 °C.

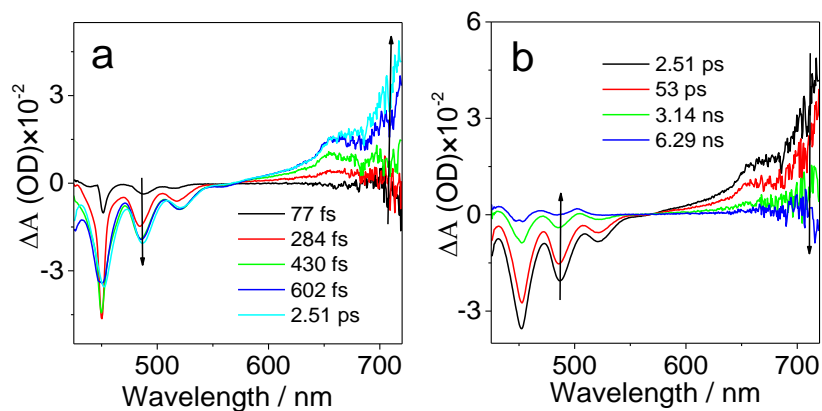

**Fig. S16** Femtosecond transient absorption spectra of **Pery-2Br** in *n*-hexane (a) at initial delays (b) at long time delays,  $\lambda_{\text{ex}} = 400$  nm. 20 °C.

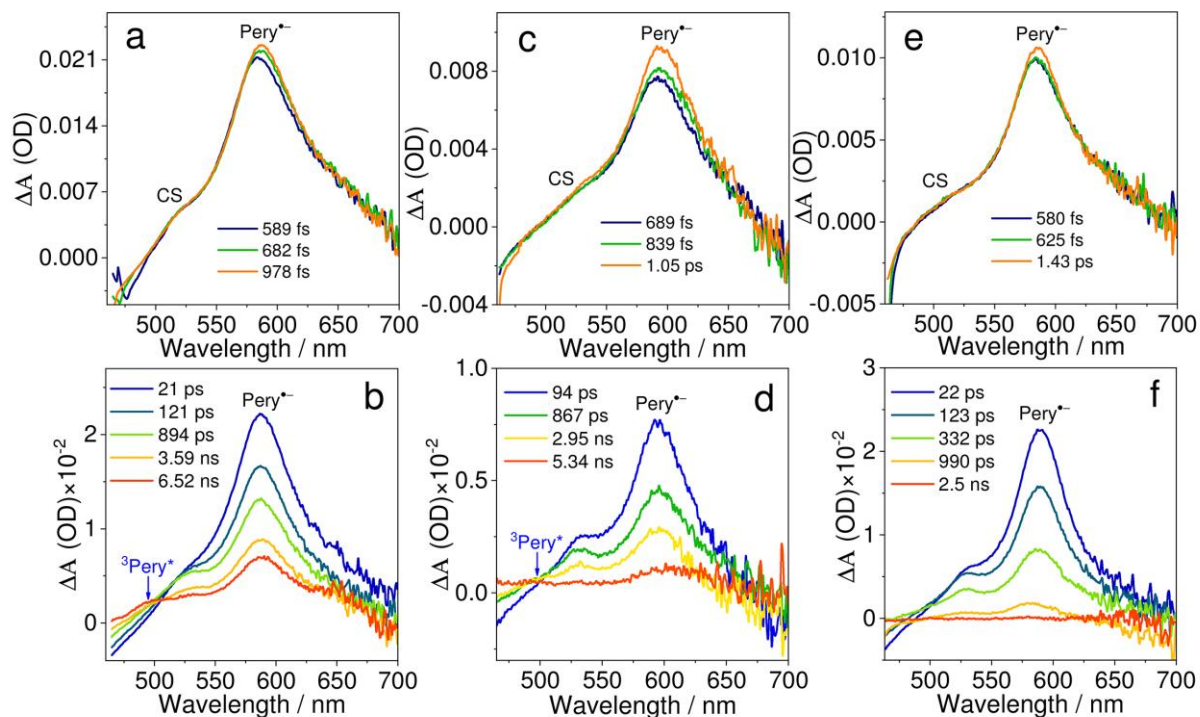

**Fig. S17** Femtosecond transient absorption spectra of **Pery-2PXZ**, (a) in n-hexane at initial delays (b) in n-hexane at long time delays, (c) in DCM at initial delays (d) in DCM at long time delays and (e) in ACN at initial delays (f) in ACN at long time delays,  $\lambda_{ex} = 450$  nm. 20 °C.

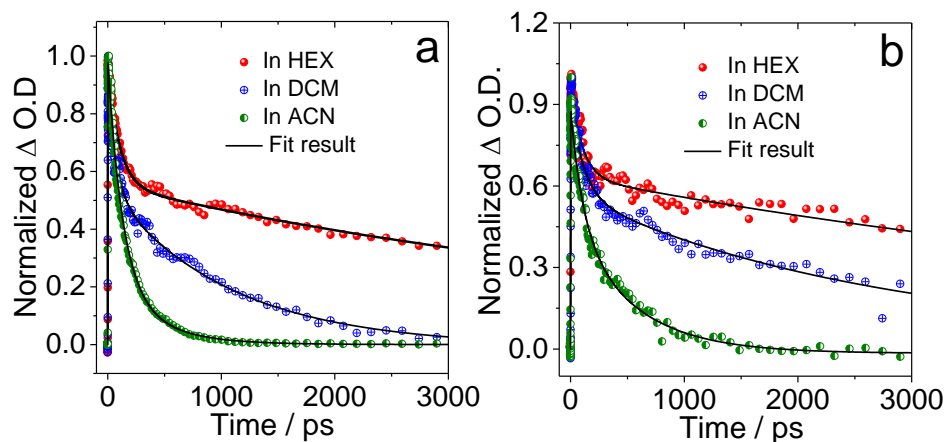

**Fig. S18** The decay curves of fs-TA data in different solvents at 590 nm of (a) **Pery-2PTZ** and (b) **Pery-2PXZ**,  $\lambda_{ex} = 450$  nm. 20 °C.

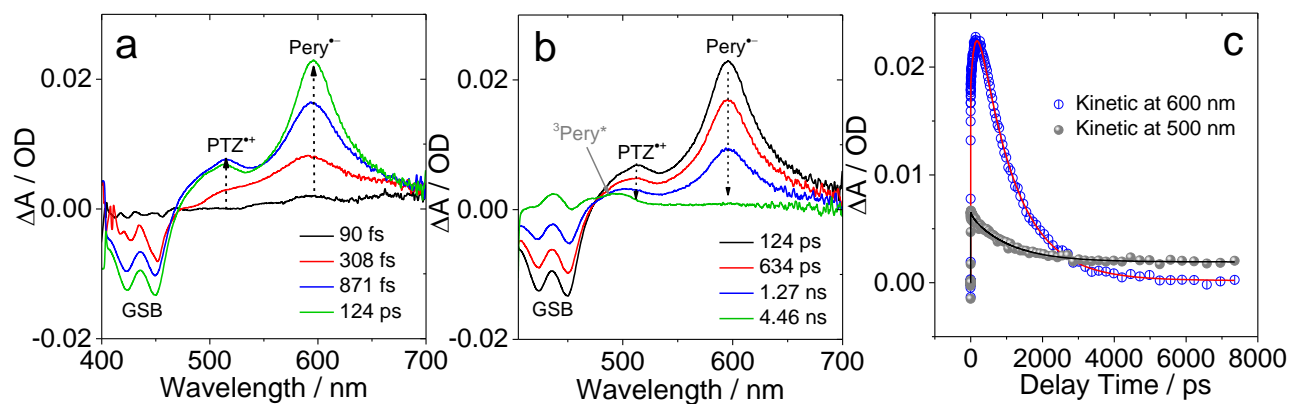

**Fig. S19** Femtosecond transient absorption spectra of **Pery-2PTZ** in DCM, (a) at initial delays (b) at long time delays (c) decay traces at selected wavelengths. GSB; Ground state bleach,  $\lambda_{ex} = 400$  nm. 20 °C.

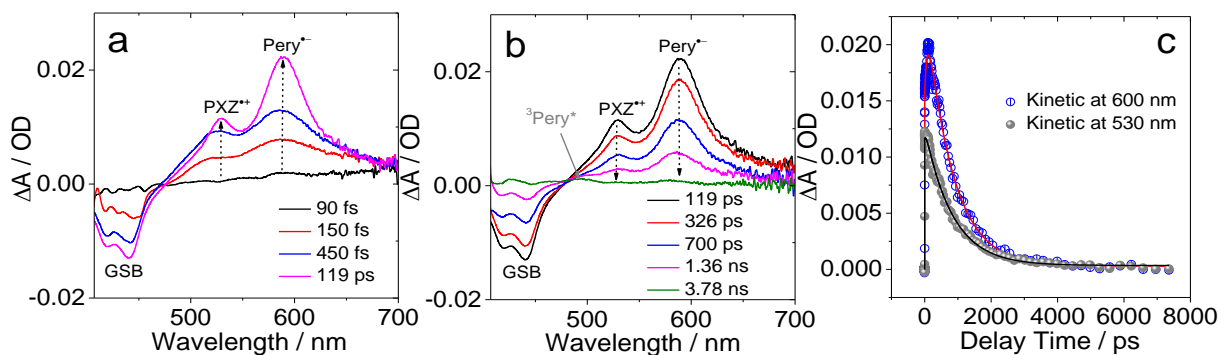

**Fig. S20** Femtosecond transient absorption spectra of **Pery-2PXZ** in DCM, (a) at initial delays (b) at long time delays (c) decay traces at selected wavelengths. GSB; Ground state bleach,  $\lambda_{\text{ex}} = 400 \text{ nm}$ .  $20 \text{ }^\circ\text{C}$ .

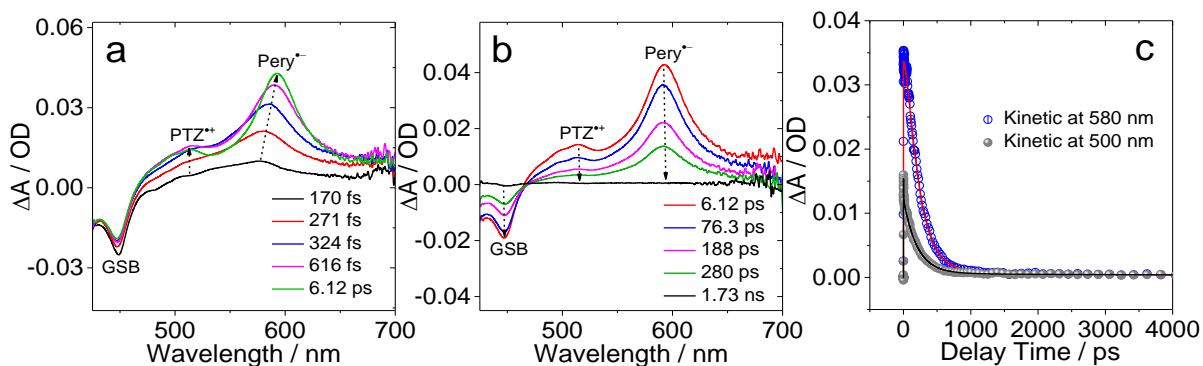

**Fig. S21** Femtosecond transient absorption spectra of **Pery-2PTZ** in ACN, (a) at initial delays (b) at long time delays (c) decay traces at selected wavelengths. GSB; Ground state bleach,  $\lambda_{\text{ex}} = 400 \text{ nm}$ .  $20 \text{ }^\circ\text{C}$ .

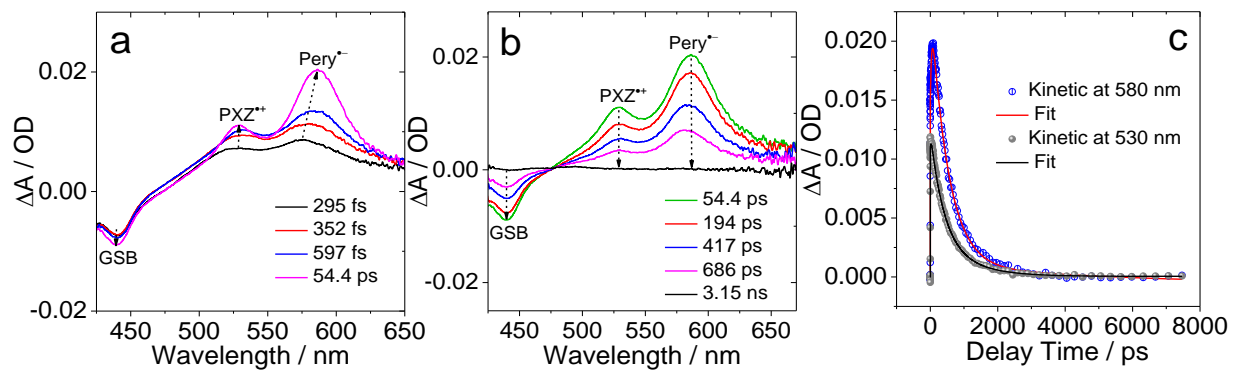

**Fig. S22** Femtosecond transient absorption spectra of **Pery-2PXZ** in ACN, (a) at initial delays (b) at long time delays (c) decay traces at selected wavelengths. GSB; Ground state bleach,  $\lambda_{ex} = 400$  nm. 20 °C.

## 9. Nanosecond transient absorption spectroscopy

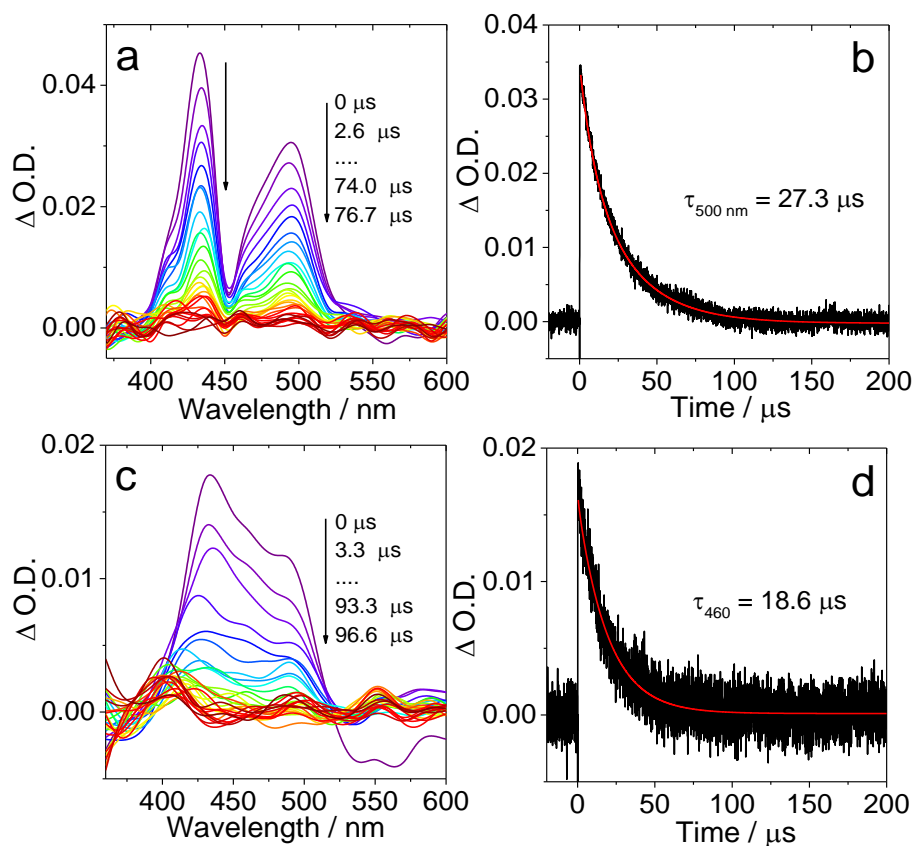

**Fig. S23** Nanosecond transient absorption spectra of (a) **Pery-2PTZ**, (b) decay trace at 500 nm; (c) **Pery-2PXZ** and (d) decay trace at 450 nm.  $c = 2.0 \times 10^{-5}$  M. In deaerated *n*-hexane,  $\lambda_{\text{ex}} = 460$  nm. 20 °C.

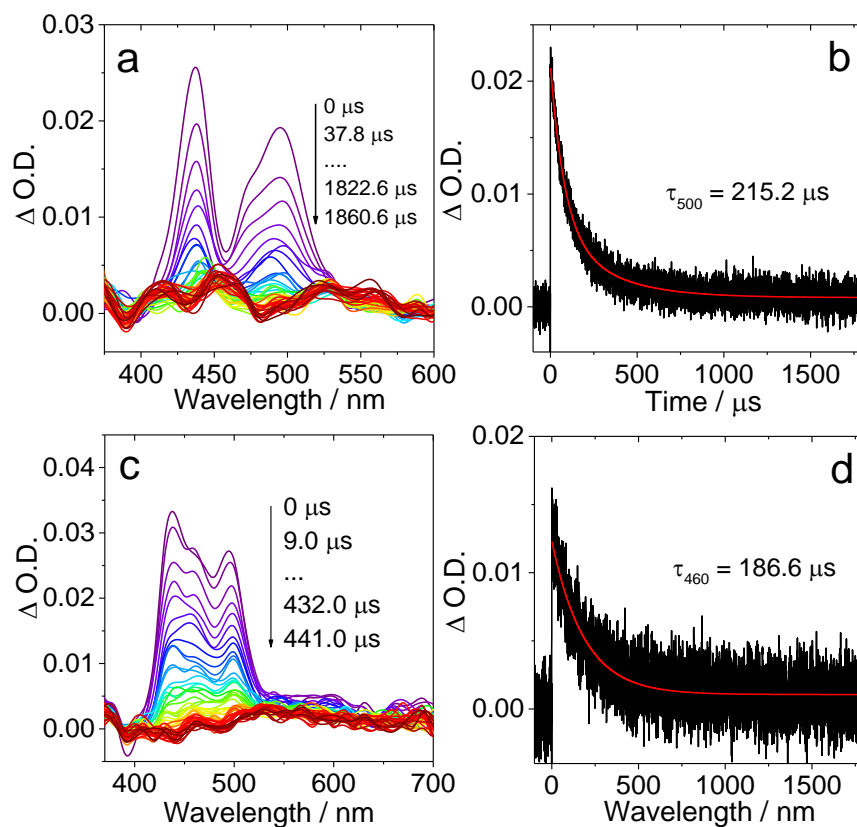

**Fig. S24** Nanosecond transient absorption spectra of (a) **Pery-2PTZ**, (b) decay trace at 500 nm; (c) **Pery-2PXZ**, and (d) decay trace at 450 nm.  $c = 2.0 \times 10^{-5}$  M. In deaerated  $CHCl_3$ ,  $\lambda_{ex} = 460$  nm. 20 °C.

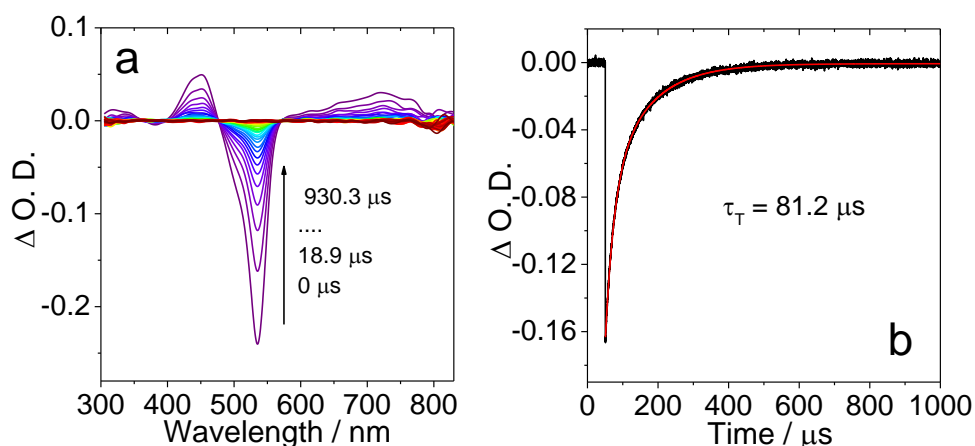

**Fig. 25** (a) Nanosecond transient absorption spectra of **diiodo-BDP** and (b) decay trace at 520 nm;  $c(\text{diiodo-BDP}) = 1.0 \times 10^{-5} \text{ M}$ , in deaerated ACN,  $\lambda_{\text{ex}} = 532 \text{ nm}$ . 20 °C.

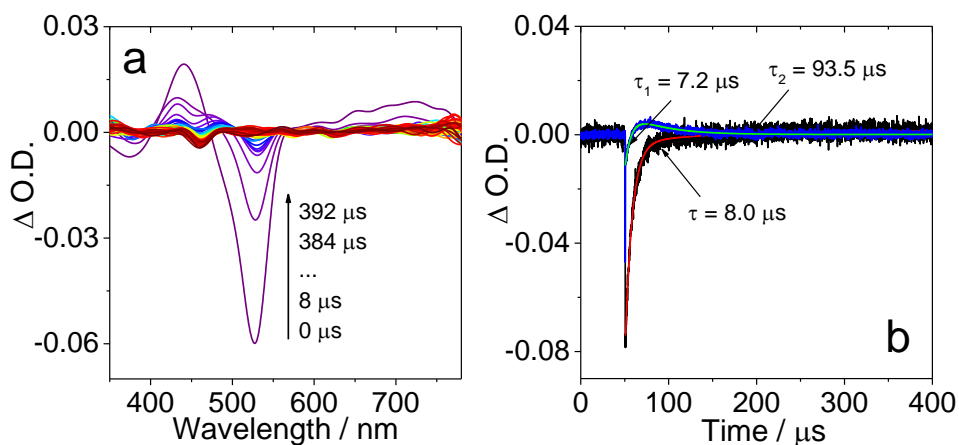

**Fig. S26** Intermolecular TTET with **diiodo-BDP** as triplet energy donor and **Pery-2PXZ** as energy acceptor: (a) ns-TA spectra of the mixture of **diiodo-BDP** ( $c = 2.0 \times 10^{-5} \text{ M}$ ) and **Pery-2PXZ** ( $c = 1.0 \times 10^{-5} \text{ M}$ ) and (b) decay trace at 490 nm, showing the rise and decay phases of TTET process. In deaerated *n*-hexane,  $\lambda_{\text{ex}} = 532 \text{ nm}$ . 20 °C.



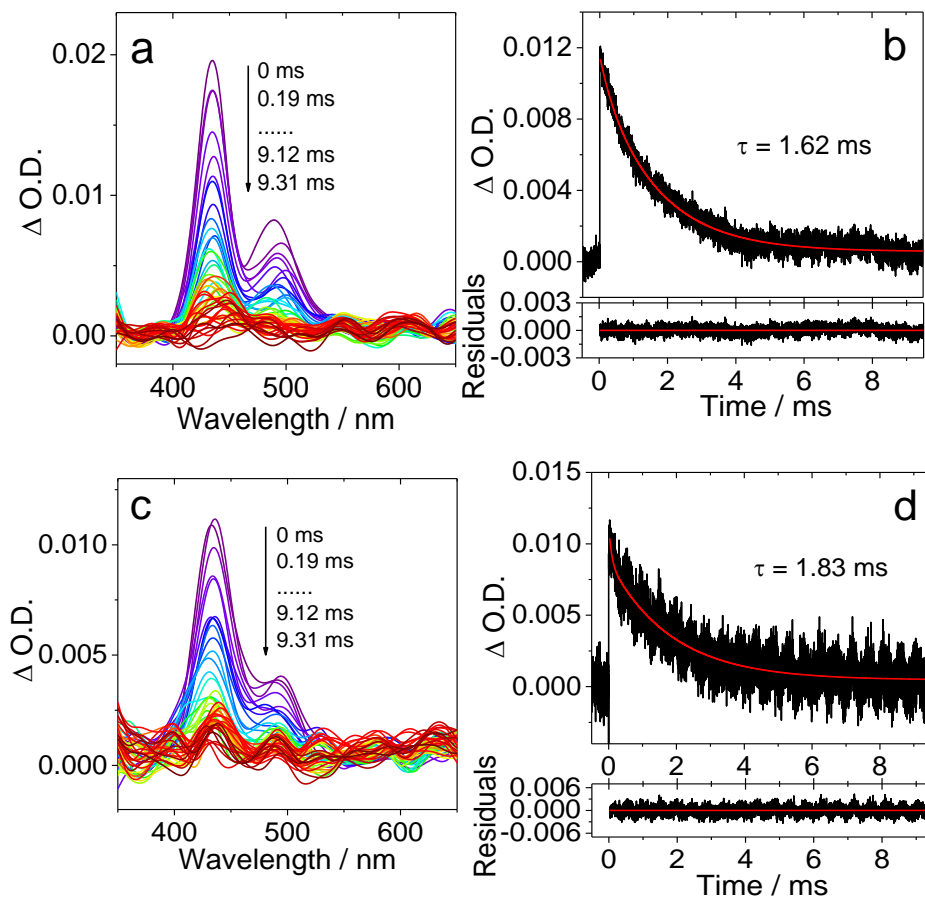

**Fig. S27** Nanosecond transient absorption spectra of (a) **Pery-2PTZ**, (b) decay trace at 490 nm, (c) **Pery-2PXZ** and (d) decay trace at 450 nm. In deaerated glycerol triacetate.  $c = 2.0 \times 10^{-5}$  M,  $\lambda_{\text{ex}} = 445$  nm, 20 °C.

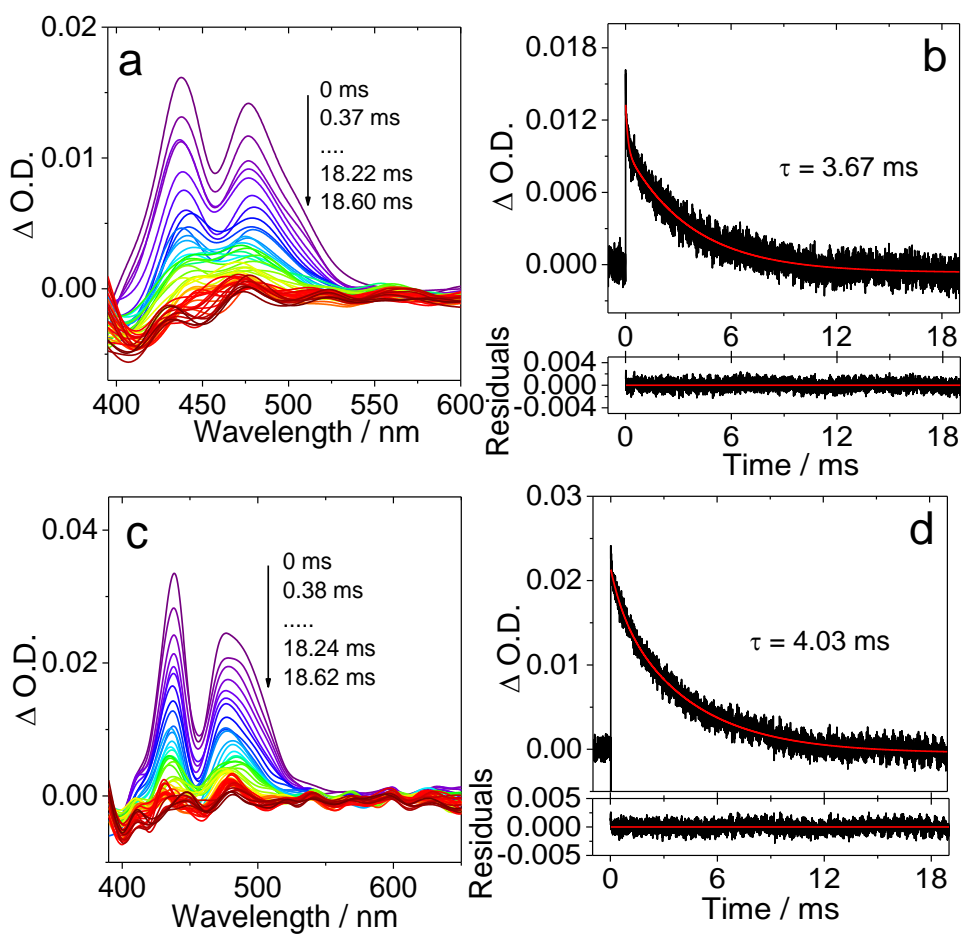

**Fig. S28** Nanosecond transient absorption spectra of **Pery-2PTZ** in Clear Flex 50 polymer film (a and b) under deaerated conditions and (c and d) under aerated conditions. Decay traces are taken at 490 nm in both cases,  $\lambda_{\text{ex}} = 445$  nm. 20 °C.

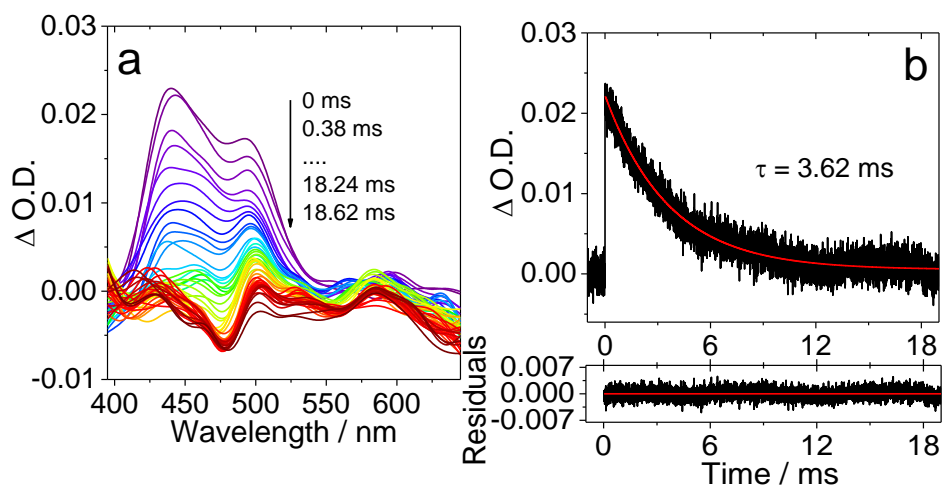

**Fig. S29** (a) Nanosecond transient absorption spectra of **Pery-2PXZ** in Clear Flex 50 film under deaerated condition and (b) decay trace at 490 nm,  $\lambda_{\text{ex}} = 440$  nm. 20 °C.

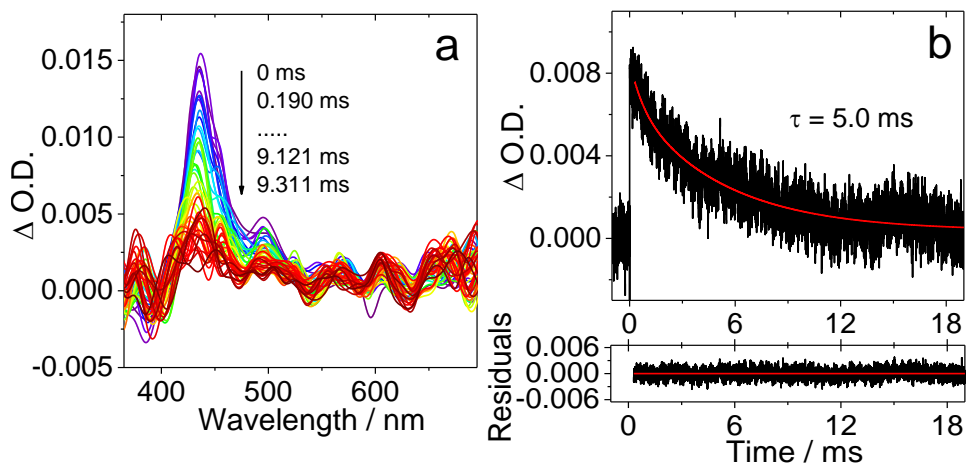

**Fig. S30** (a) Nanosecond transient absorption spectra of **Pery-2PXZ** in polymethylmethacrylate (PMMA) doped film under deaerated condition and (b) decay trace at 455 nm,  $\lambda_{\text{ex}} = 440$  nm. 20 °C.

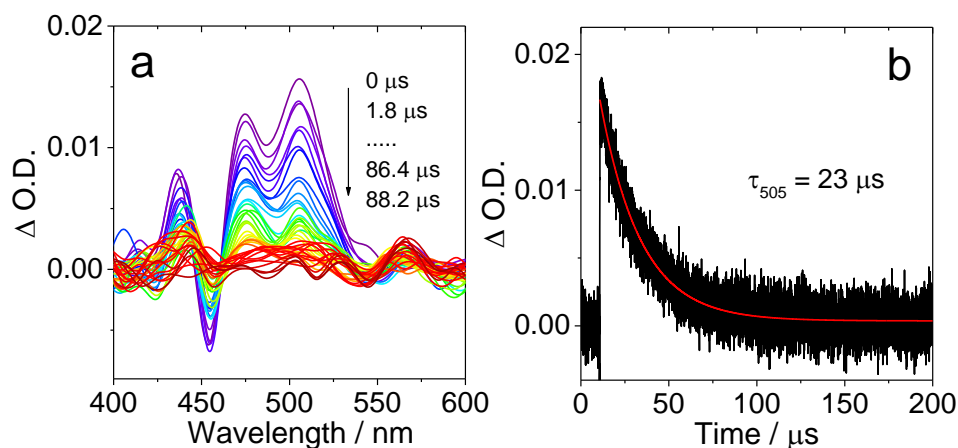

**Fig. S31** (a) Nanosecond transient absorption spectra of **Pery-2Br** and (b) decay trace at 505 nm,  $\lambda_{\text{ex}} = 440$  nm.  $c = 2.0 \times 10^{-5}$  M. In deaerated toluene. 20 °C.

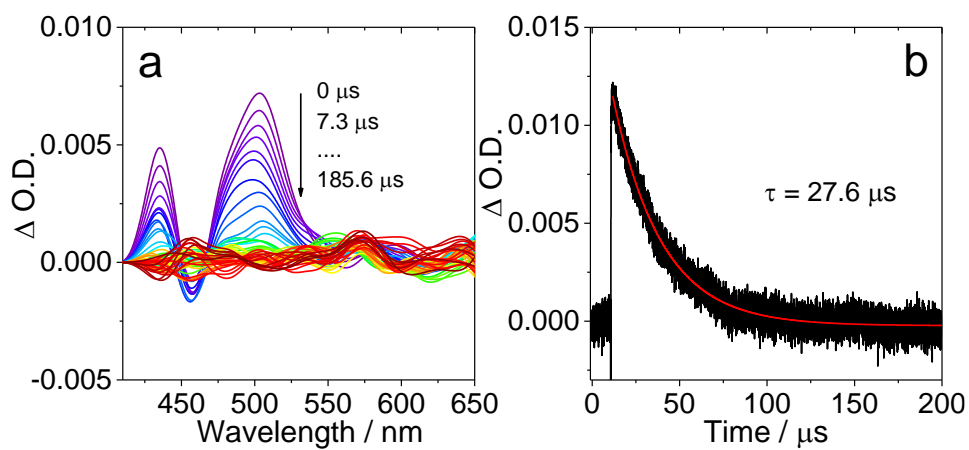

**Fig. S32** (a) Nanosecond transient absorption spectra of **Pery-2Br** in film (Clear Flex 50) and (b) decay trace at 505 nm,  $\lambda_{\text{ex}} = 440$  nm. 20 °C.

## 10. Intrinsic triplet state lifetime fitting parameters

When the intrinsic lifetime of triplet states is long and the concentration of the triplet states is high, the triplet-triplet annihilation will contribute an additional lifetime quenching factor to the decay of the transient absorption. Then triplet state lifetime will be quenched significantly and the experimental values will be shorter than the intrinsic lifetime. The corresponding differential equations for the triplet concentration fitting of the decay traces are given below. We fitted the decay curves taken at different concentrations ( $c = 5.0 \times 10^{-6}$  M and  $2.0 \times 10^{-5}$  M) with a kinetic model to eliminate the TTA self-quenching effect with Eq. S6.

has the solution: 
$$\frac{dc_T}{dt} = -k_1c_T - k_2c_T^2 \quad (\text{Eq. S6})$$

$$c_T(t) = \frac{c_0 k_1}{\exp(k_1 t) \cdot (c_0 k_2 + k_1) - c_0 k_2} \quad (\text{Eq. S7})$$

Where  $c_0$  is the initial triplet concentration. This leads to the following expression for the triplet absorption

$$A(t) = \frac{A_0 \tau_2 / \tau_1}{\exp(t/\tau_1) \cdot (1 + \tau_2 / \tau_1) - 1} \quad (\text{Eq. S8})$$

Where  $A(t)$  and  $A_0$  are the optical density ( $\Delta$  O.D.) values of the triplet state decay traces at  $t$  and 0 moment;  $\tau_1 = 1/k_1$  is the intrinsic triplet state lifetime;  $\tau_2 = 1/c_0 k_2$  is the triplet state lifetime related with TTA quenching effect. We fitted the data sets of **Pery-2PTZ** and **Pery-2PXZ** triads triplet state lifetimes values measured in solutions simultaneously by using Eq. S8, with the variation of these parameters ( $A_0$ ,  $\tau_1$ ,  $\tau_2$ ), but with the intrinsic triplet lifetime constrained to the same value in all data sets.

## 11. Nanosecond transient emission spectroscopy

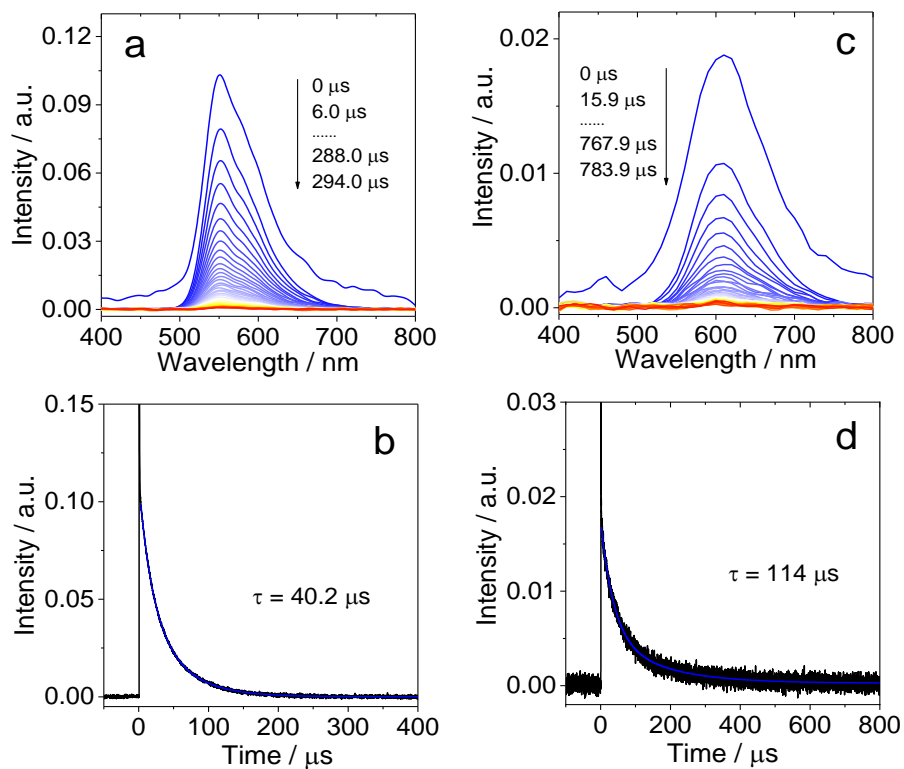

**Fig. S33** Nanosecond transient emission spectra of **Pery-2PXZ** (a) in deaerated *n*-hexane, (b) respective decay trace at 550 nm, (c) in deaerated toluene and (d) respective decay trace at 610 nm. Upon pulsed laser excitation,  $\lambda_{\text{ex}} = 445 \text{ nm}$ , 1.8 mJ/pulse, pulse duration 5 ns.  $c = 1.0 \times 10^{-5} \text{ M}$ . 20 °C.

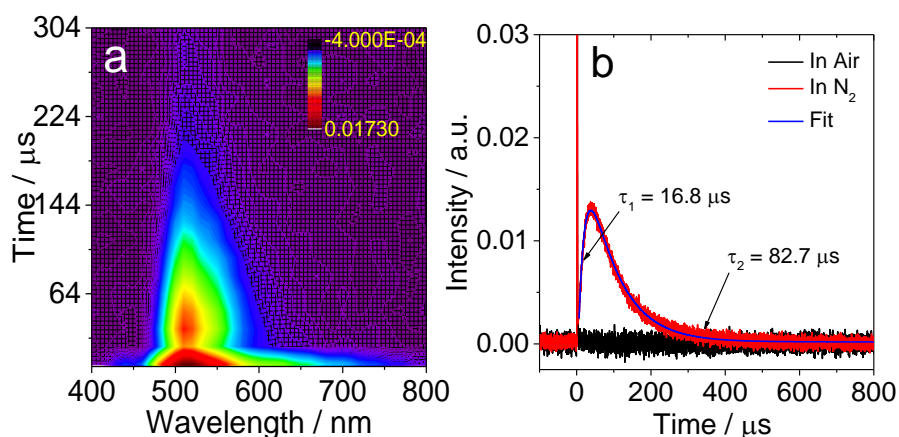

**Fig. S34.** (a) Delayed fluorescence 2D contour map of **Pery-2PXZ** ( $\lambda_{em} = 470$  nm) and (b) Respective fluorescence decay trace at 510 nm in deaerated and aerated solutions. The spike at time 0 in (b), is the scattered laser.  $c = [\mathbf{Pery-2PXZ}] = 1.0 \times 10^{-5}$  M and  $[\mathbf{SG-5}] = 2.0 \times 10^{-5}$  M. In deaerated  $\text{CHCl}_3$ ,  $\lambda_{ex} = 445$ . 20 °C.

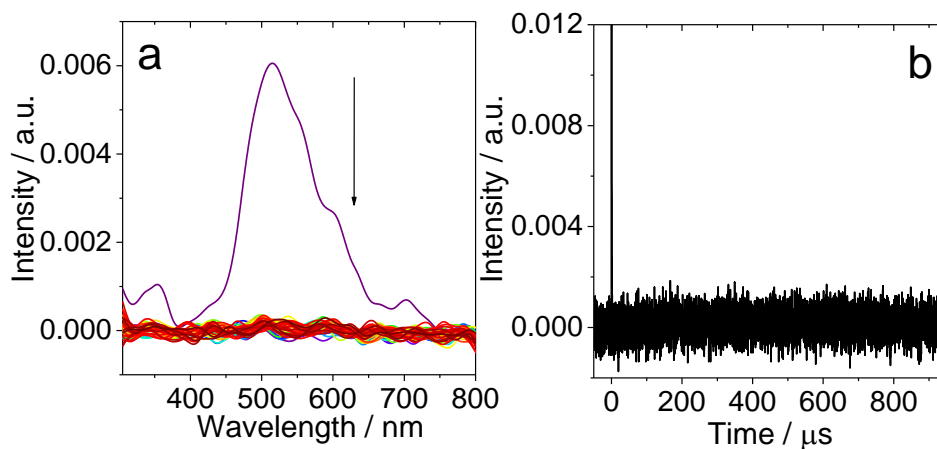

**Fig. S35.** (a) Delayed fluorescence of **Pery-2PXZ** in deaerated glycerol triacetate, (b) Respective fluorescence decay trace at 510 nm.  $c = [\mathbf{Pery-2PXZ}] = 1.0 \times 10^{-5}$  M and  $[\mathbf{SG-5}] = 2.0 \times 10^{-5}$  M,  $\lambda_{ex} = 445$ . 20 °C.

## 12. Density functional theory calculations

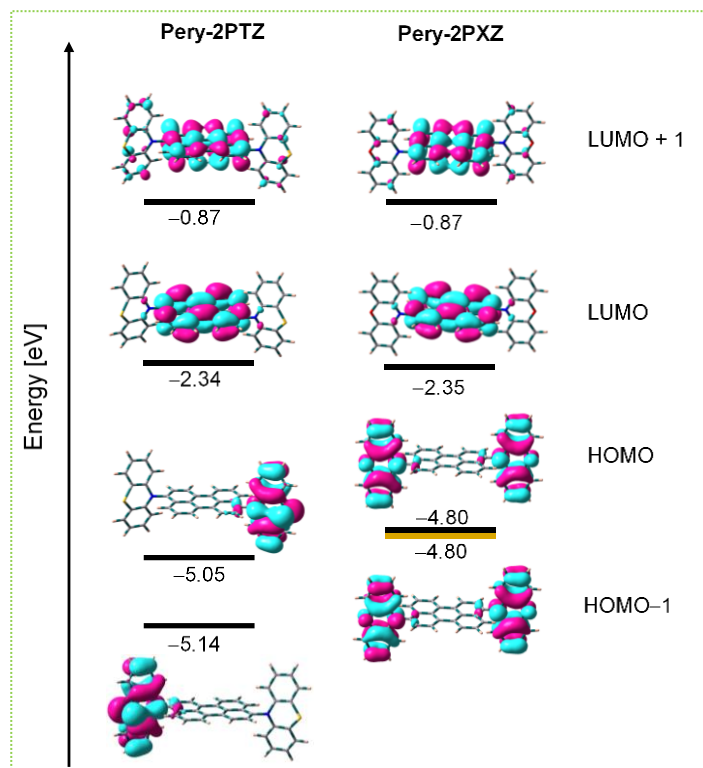

**Fig. S36.** Frontier molecular orbitals diagram of the triads at optimized singlet ground state geometries, using Gaussian 09 Level at B3LYP/6-31G.

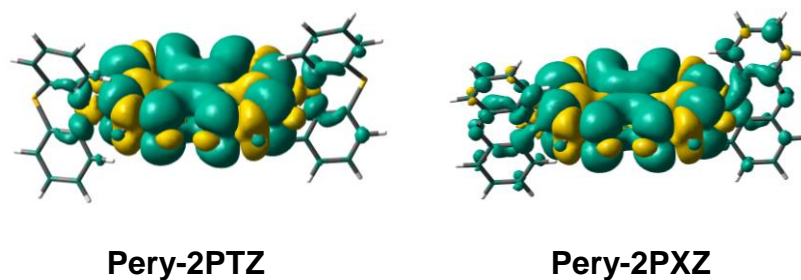

**Fig. S37.** Isosurfaces of spin density distribution at optimized triplet state in ACN, using Gaussian 09 Level at B3LYP/6-31G.



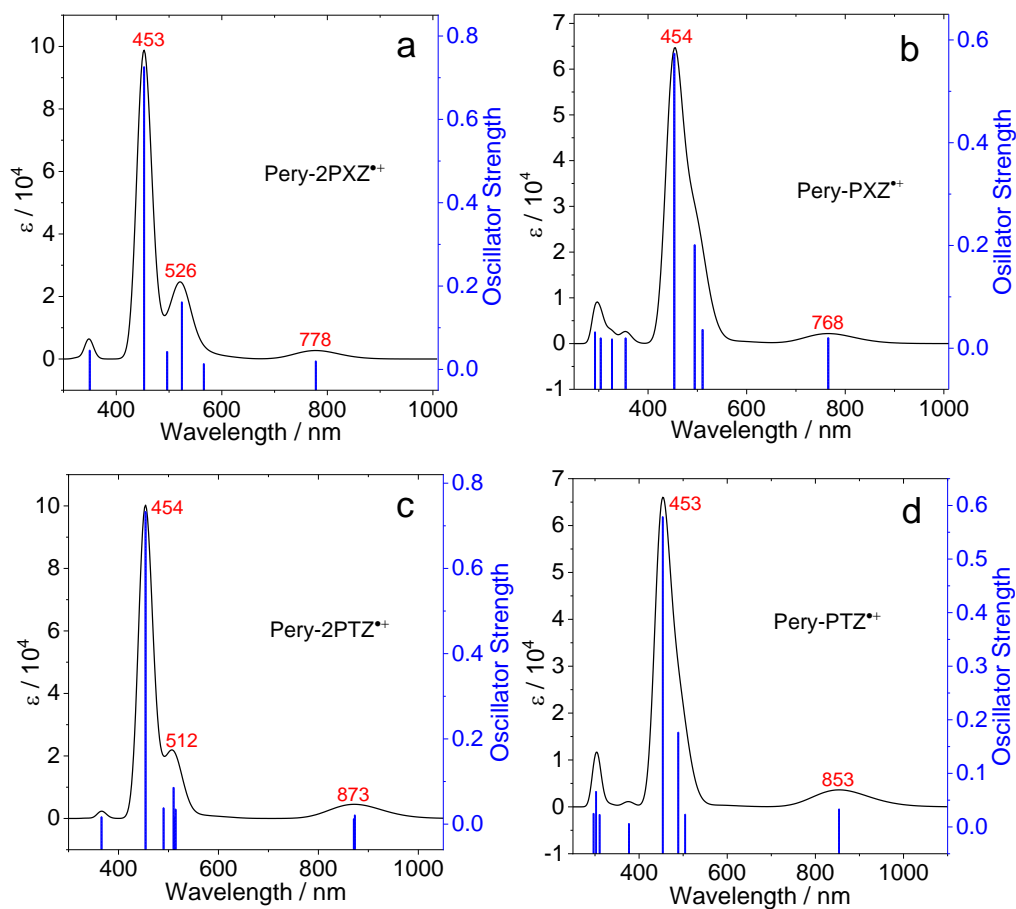

**Fig. S38** DFT calculated UV-vis absorption spectra of (a) **Pery-2PXZ<sup>•+</sup>**, (b) **Pery-PXZ<sup>•+</sup>**, (c) **Pery-2PTZ<sup>•+</sup>** and (d) **Pery-PTZ<sup>•+</sup>**, in ACN (PCM model). Drop lines indicate oscillator strengths. The calculated spectra are obtained at the UB3LYP/6-31G(d) level using Gaussian 09.

**Scheme S1.** Simplified Jablonski diagram representing the photophysical processes involved in **Pery-2PXZ** upon direct photoexcitation<sup>a</sup>

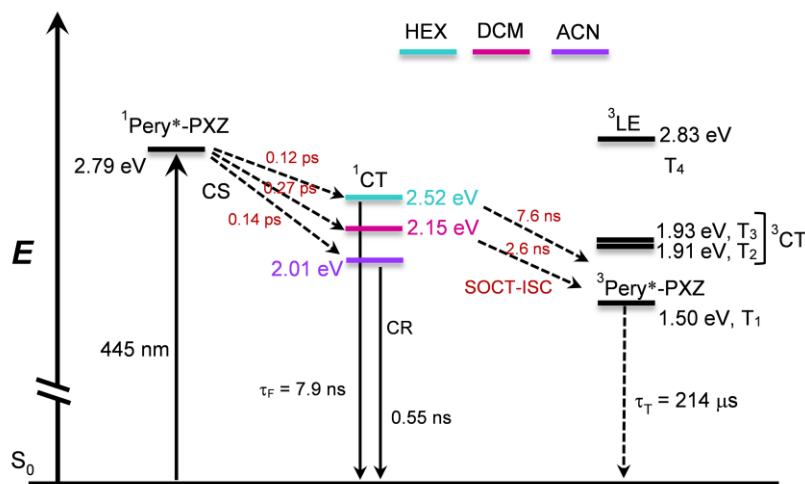

<sup>a</sup>The energy levels of the singlet excited states were derived from the spectroscopic data and the energy levels of the <sup>1</sup>CT states were obtained from the average of absorption and emission maxima and from the electrochemistry data. The energy levels of the triplet states were taken from TDDFT calculations. The numbers in superscript designate the spin multiplicity.

### 13. References

1. T. Matray. US Pat., WO 2017/197144 A1, 2017; Sony Corporation (Tokyo, JP), Sony Corporation of America (New York, NY, US).
2. K. Hayashi and M. Inouye, *Eur. J. Org. Chem.*, 2017, **2017**, 4334-4337.
